# Supplementary material for: Immunodominant T-cell epitopes from the SARS-CoV-2 spike antigen reveal robust pre-existing T-cell immunity in unexposed individuals
Source: Springer Nature journal article supplement (doi:10.1038/s41598-021-92521-4), 2021-06-23
Supplement: 41598_2021_92521_MOESM1_ESM.pdf [file 41598_2021_92521_MOESM1_ESM.pdf]

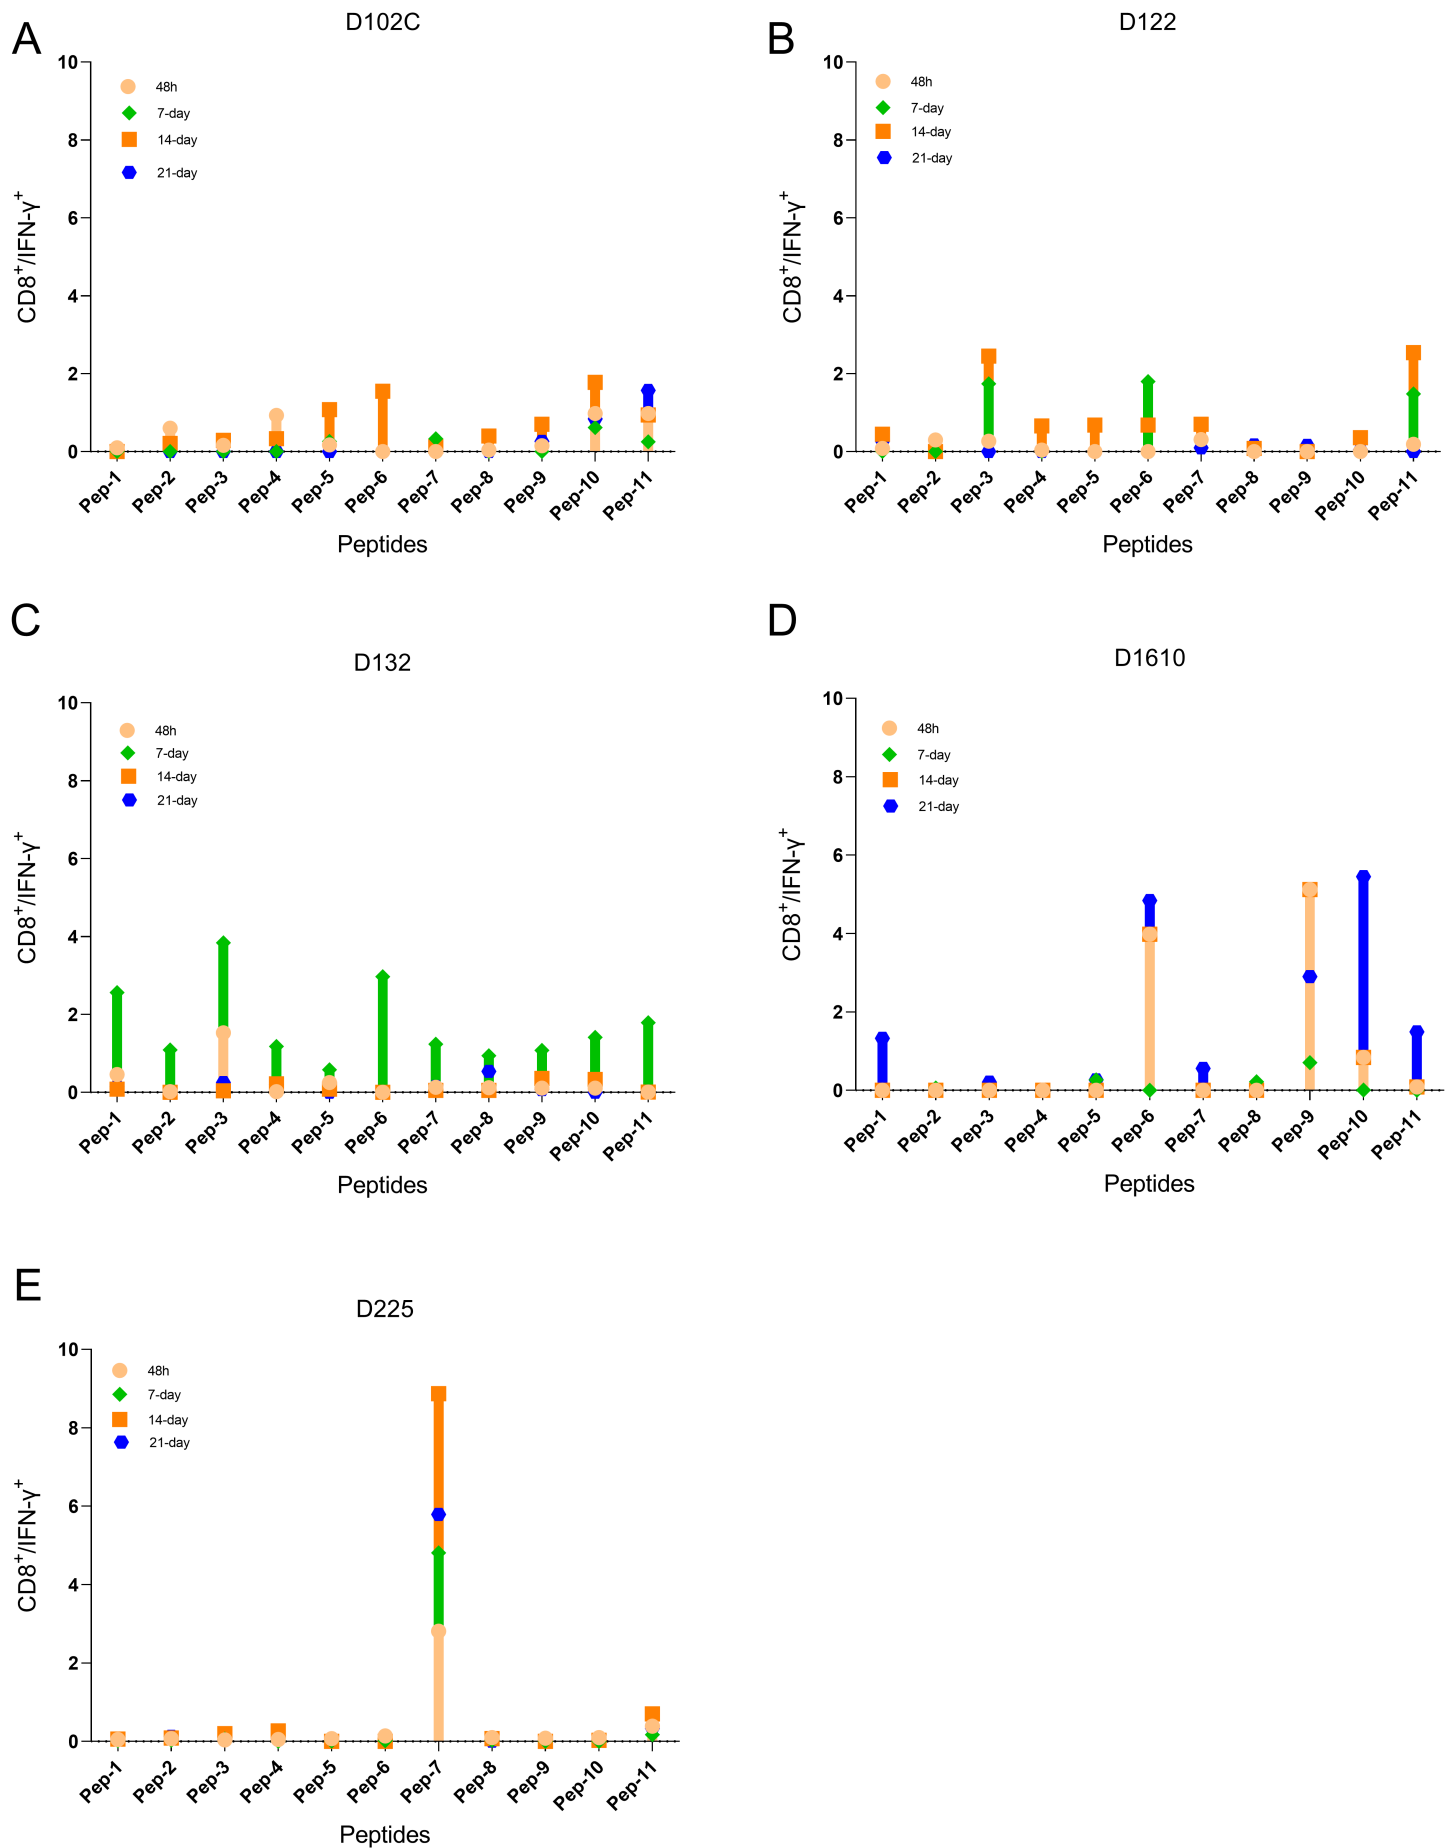

Figure S1: . A-E. Kinetics and magnitude of IFN- $\gamma$  expression by CD8 T-cells in the presence of individual peptides from the 11-peptide-mix in unexposed donors.
