# Supplementary material for: Immunodominant T-cell epitopes from the SARS-CoV-2 spike antigen reveal robust pre-existing T-cell immunity in unexposed individuals
Source: Springer Nature journal article supplement (doi:10.1038/s41598-021-92521-4), 2021-06-23
Supplement: 41598_2021_92521_MOESM2_ESM.pdf [file 41598_2021_92521_MOESM2_ESM.pdf]

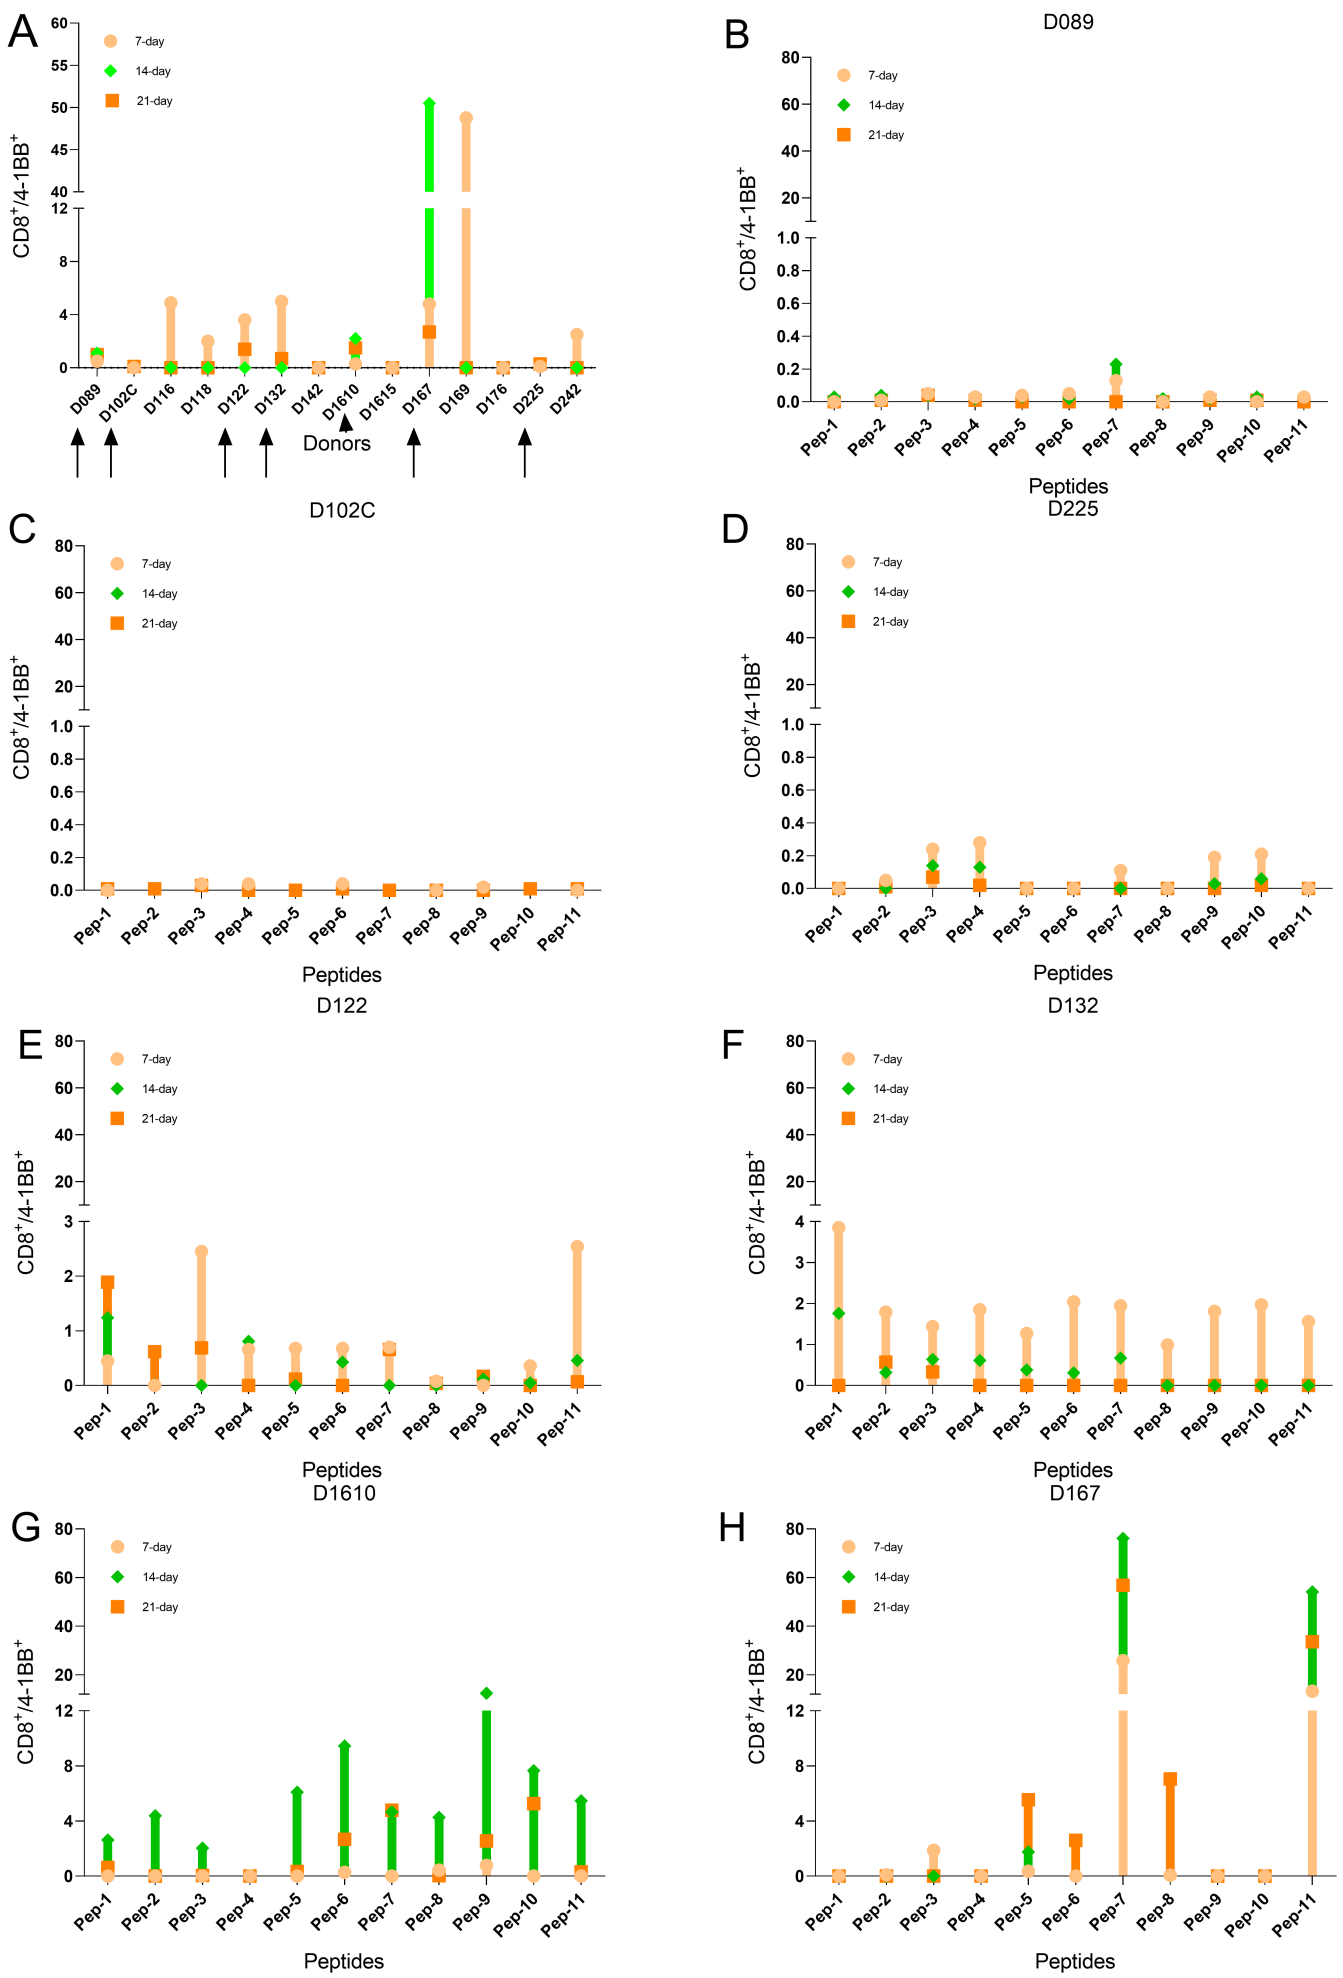

Figure S2. A-F. Kinetics and magnitude of 4-1BB expression by CD8 T-cells in the presence of the 11-peptide mix or individual peptides in unexposed donors.
