# Supplementary material for: Immunodominant T-cell epitopes from the SARS-CoV-2 spike antigen reveal robust pre-existing T-cell immunity in unexposed individuals
Source: Springer Nature journal article supplement (doi:10.1038/s41598-021-92521-4), 2021-06-23
Supplement: 41598_2021_92521_MOESM11_ESM.pdf [file 41598_2021_92521_MOESM11_ESM.pdf]

# D169

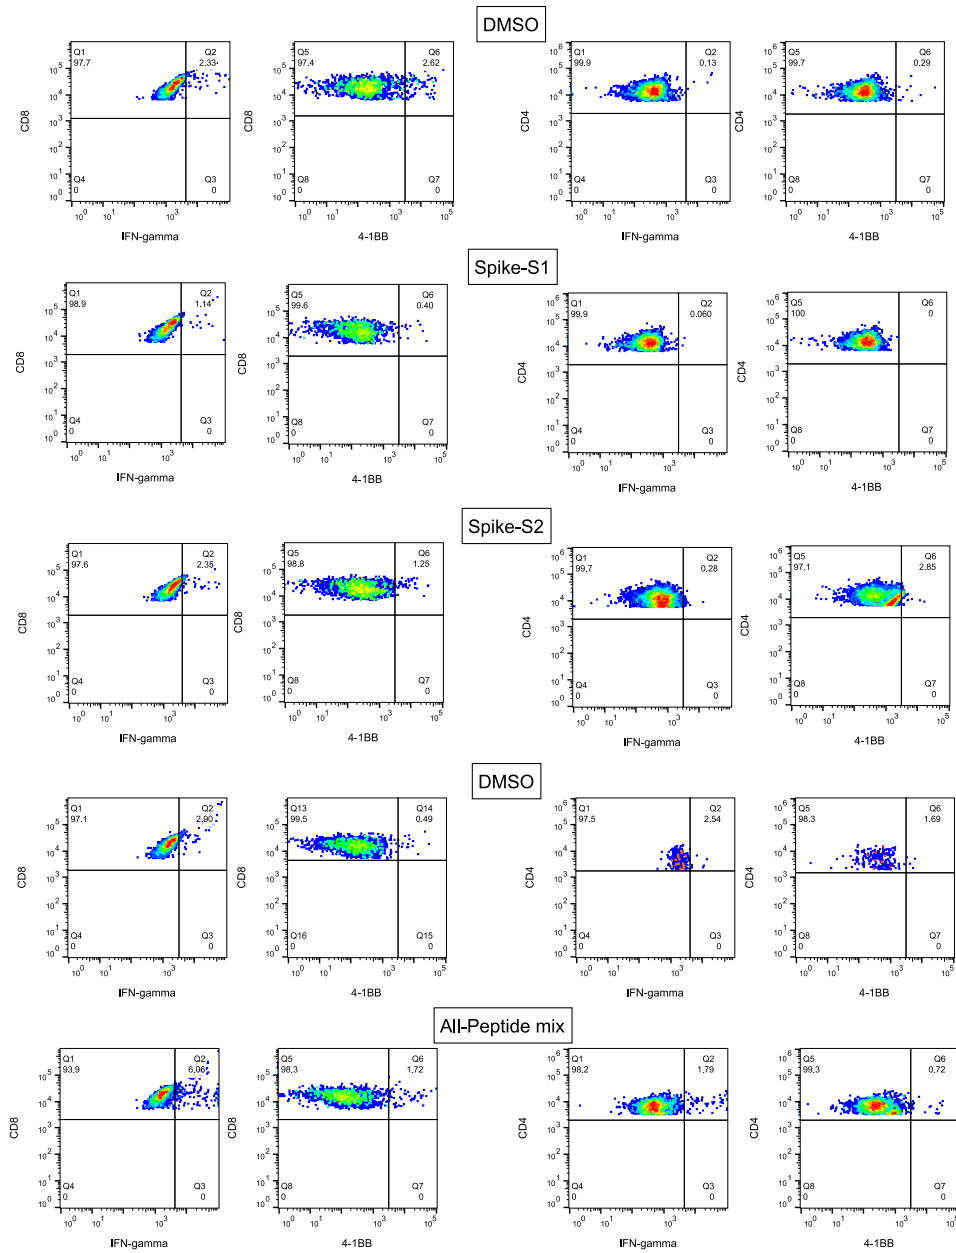

Figure S11. FACS profile of CD4 and CD8 T-cell activation in the presence of different antigens. The gating scheme included the following steps: Live cells > CD3+ T-cells > CD4 and CD8 T-cells > CD4-IFN- $\gamma$ /4-1BB and CD8-IFN $\gamma$ /4-1BB.

# D169

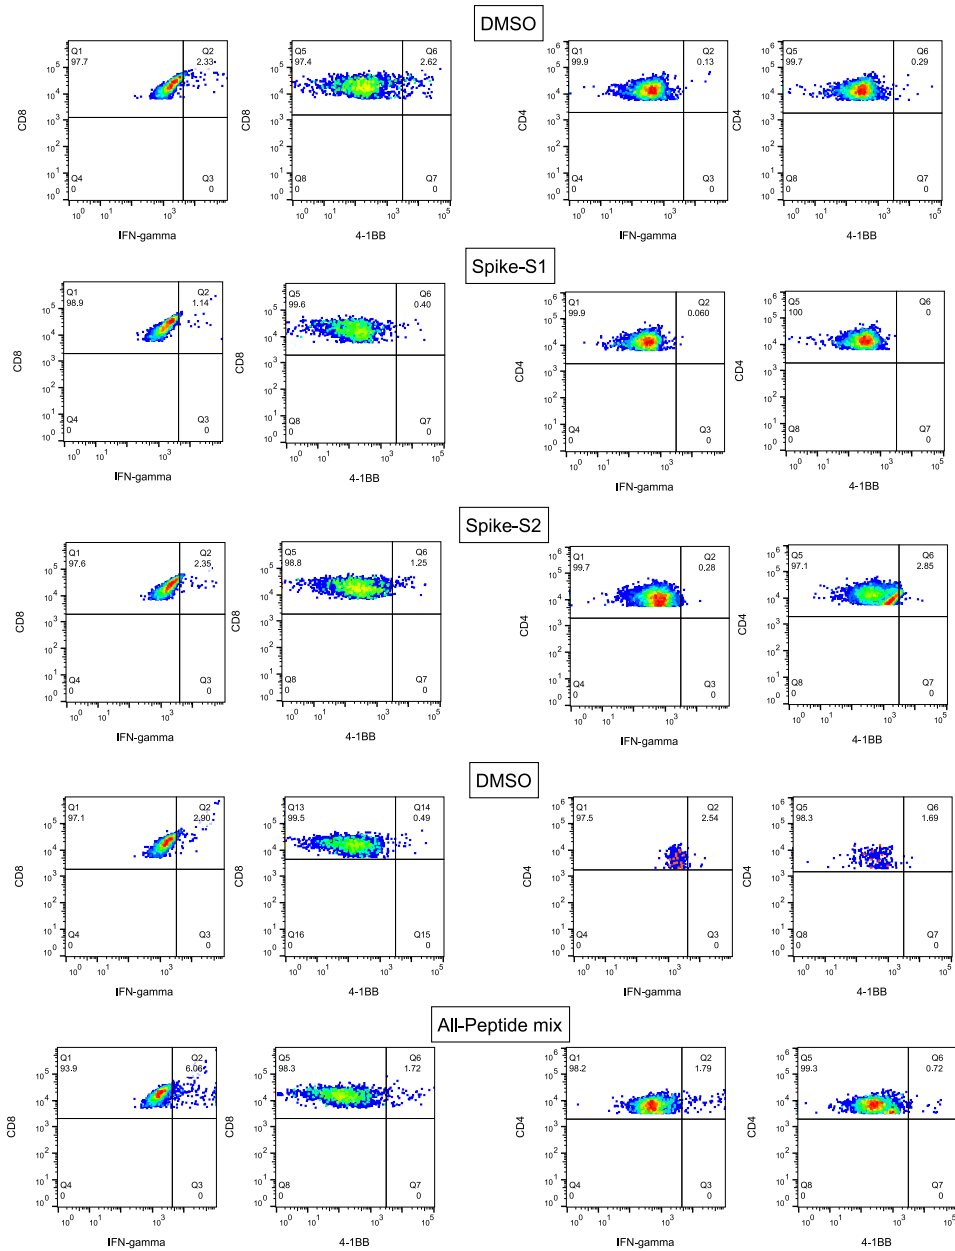

Figure S11. FACS profile of CD4 and CD8 T-cell activation in the presence of different antigens. The gating scheme included the following steps: Live cells > CD3+ T-cells > CD4 and CD8 T-cells > CD4-IFN- $\gamma$ /4-1BB and CD8-IFN $\gamma$ /4-1BB.
