# Supplementary material for: Immunodominant T-cell epitopes from the SARS-CoV-2 spike antigen reveal robust pre-existing T-cell immunity in unexposed individuals
Source: Springer Nature journal article supplement (doi:10.1038/s41598-021-92521-4), 2021-06-23
Supplement: 41598_2021_92521_MOESM13_ESM.pdf [file 41598_2021_92521_MOESM13_ESM.pdf]

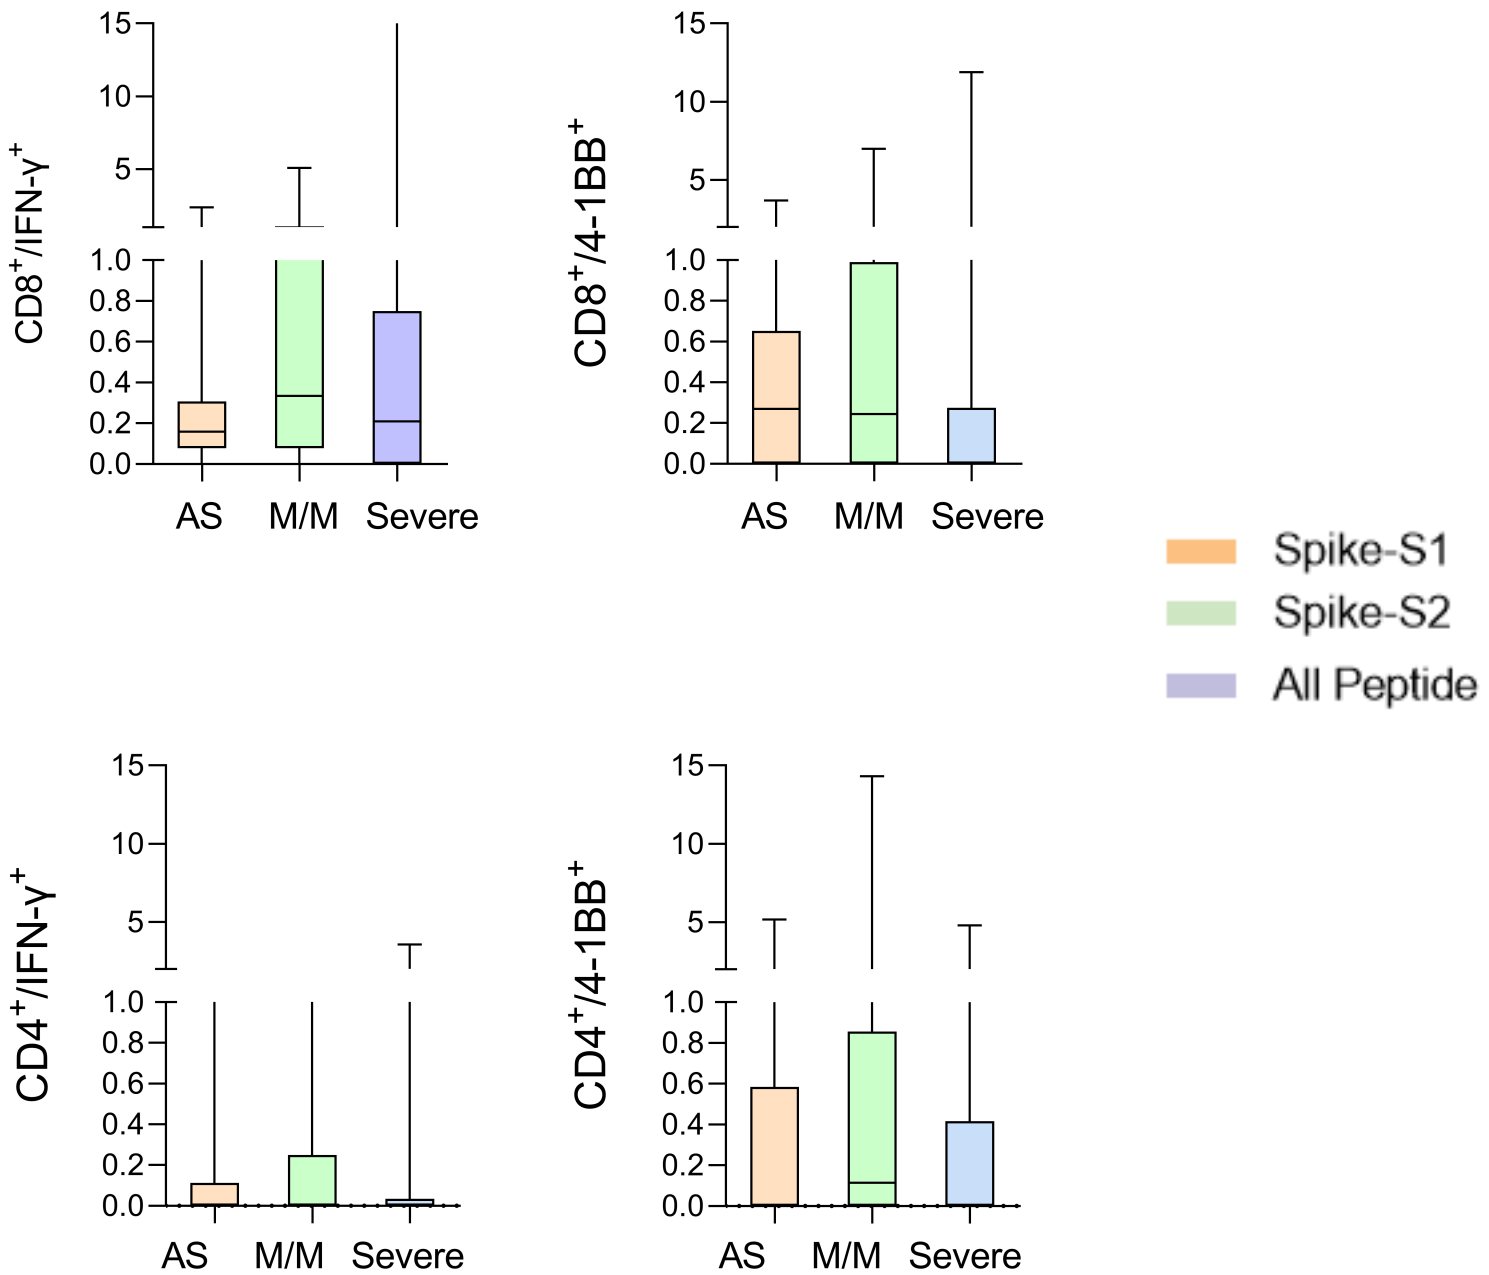

Figure S13. Aggregated T-cell activation data of convalescent patient samples. Related to Figure 5.
